# Supplementary material
Source: PubMed Central journal article supplement (PMC4838203)
Supplement: NIHMS720513-supplement-01.pdf [file NIHMS720513-supplement-01.pdf]

4/14/16

significantly reduced RBC (**ac**) but not WBC (**ad**) or platelet counts (**ae**) in the blood of mice that had been repeatedly bled. The data in **q-ae** represent mean $\pm$ s.d. from 3 independent experiments. The numbers of mice per treatment are shown in each bar in each panel. Statistical significance of differences among genotypes was assessed using a Repeated Measures one-way ANOVA with Greenhouse-Geisser correction along with Tukey's multiple comparison tests with individual variances. \* indicates statistical significance relative to normal mice; # indicates statistical significance between *Scf* mutant mice and control mice after bleeding (\* or # P<0.05, \*\* or ## P<0.01, \*\*\* P<0.001).

**Supplementary video 1. HSCs are closely associated with *Tcf21*-Cre/ER-expressing stromal cells in the red pulp of the spleen.** The video shows a 300  $\mu$ m thick section of spleen from a *Tcf21<sup>cre/ER</sup>; R26<sup>tdTomato</sup>;  $\alpha$ -catulin-GFP* mouse in which EMH was induced by treatment with Cy+21d G-CSF. The spleen section was stained with antibodies against c-kit (white),  *$\alpha$ -catulin-GFP* (green), and DsRed (red), then cleared, imaged, and digitally reconstructed. HSCs are  *$\alpha$ -catulin-GFP<sup>+</sup>c-kit<sup>+</sup>*. To show the spatial relationship between  *$\alpha$ -catulin-GFP<sup>+</sup>c-kit<sup>+</sup>* HSCs and Tomato<sup>+</sup> cells all channels 20-30  $\mu$ m beyond the spot of interest were occasionally masked. Note that the capsule on the margin of the spleen section is highly autofluorescent.

**Extended Data Table 1: Genes that are significantly (>8-fold and P<0.015) more highly expressed by *Scf*-GFP<sup>+</sup> stromal cells in spleen as compared to bone marrow.** Data show mean $\pm$ s.d. for log<sub>2</sub> transformed expression values (n=3 independent samples/cell population). Maximal background expression was considered to be 6.6 (log<sub>2</sub>(100)); all expression values below this threshold were set to 6.6 for purposes of calculating fold-change. Two-tailed Student's t-tests were used to assess statistical significance. Data for bone marrow *Scf*-GFP<sup>+</sup> stromal cells are from<sup>19</sup>.
